- education abstracts presented at the Society of General Internal Medicine Annual Meeting. *J Gen Intern Med* 2015; 30:1172–7
42. Eaton JE, Reed DA, Aboff BM, Call SA, Chelminski PR, Thanarajasingam U, Post JA, Thomas KG, Dupras DM, Beckman TJ, West CP, Wittich CM, Halvorsen AJ, McDonald FS: Update in internal medicine residency education: A review of the literature in 2010 and 2011. *J Grad Med Educ* 2013; 5:203–10
  43. Wells G, Shea B, O'Connell D, Peterson J, Welch V, Losos M, Tugwell P: The Newcastle-Ottawa Scale (NOS) for assessing the quality of nonrandomised studies in meta-analyses. Available at: [http://www.ohri.ca/programs/clinical\\_epidemiology/oxford.asp](http://www.ohri.ca/programs/clinical_epidemiology/oxford.asp). Accessed July 10, 2018.

## ANESTHESIOLOGY REFLECTIONS FROM THE WOOD LIBRARY-MUSEUM

# Chloroforming Coughs? A Tin of Gibson's Linseed, Liquorice, and Chlorodyne

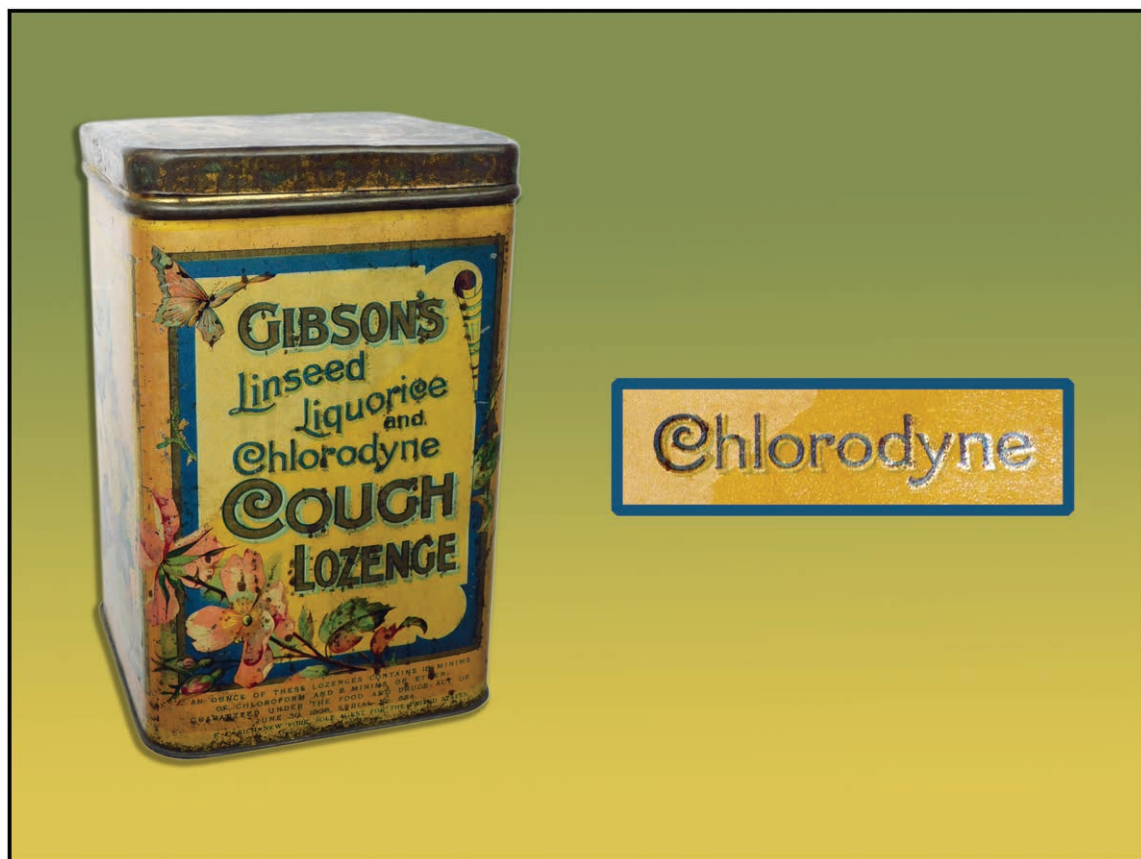

During an 1848 cholera outbreak in India, British Army Surgeon J. Collis Browne, M.R.C.S. (1819 to 1884) used Chlorodyne—his formulation of laudanum, cannabis, and chloroform—as an antidiarrheal remedy. Years later, he partnered with London pharmacist J. T. Davenport to mass-market Chlorodyne as a panacea. From Manchester, England, Robert Gibson & Sons combined Chlorodyne with Linseed and Liquorice in decorative tins of cough lozenges (above). By 1901 these “beautifully enameled counter show tins” were advertised to American professionals and the public as filled with cough lozenges that “act like magic.” (Copyright © the American Society of Anesthesiologists’ Wood Library-Museum of Anesthesiology.)

*George S. Bause, M.D., M.P.H., Honorary Curator and Laureate of the History of Anesthesia, Wood Library-Museum of Anesthesiology, Schaumburg, Illinois, and Clinical Associate Professor, Case Western Reserve University, Cleveland, Ohio. UJYC@aol.com.*
